# Supplementary material for: The impact of mask-wearing influenced by restricted interest and repetitive behavior on the mental distress of individuals with autism spectrum disorder during the COVID-19 pandemic: a multisite survey
Source: Research Square preprint supplement (doi:10.21203/rs.3.rs-1552588/v1), 2022-04-26
Supplement: Supplementary file 1 [file 192aadbe3272beca5124fd6f.docx]

Supplementary Information for “**The impact of mask-wearing influenced by restricted interest and repetitive behavior on the mental distress of individuals with autism spectrum disorder during the COVID-19 pandemic: a multisite survey**” by Tamon et al.

**Supplementary Methods**

**CRISIS-AFAR quesionnaires**

**Changes in life**

**Sleep and exercise**

No. 43 (three months prior to the pandemic) and No. 67 (past two weeks of the survey):

**“What time did your child go to bed on WEEKDAYS?”**

No. 44 (three months prior to the pandemic) and No. 68 (past two weeks of the survey):

“**What time did your child go to bed on WEEKENDS?”**

The answers for these questions were formulated in a Likert-type format: (1) “before 8 pm,” (2) “8 pm–10 pm,” (3) “10 pm–12 am,” and (4) “after midnight.”

No. 45 (three months prior to the pandemic) and No. 69 (past two weeks of the survey):

**“How many hours per night did your child sleep on WEEKDAYS?”**

No. 46 (three months prior to the pandemic) and No. 70 (past two weeks of the survey):

**“How many hours per night did your child sleep on WEEKENDS?”**

The answers for these questions were formulated in a Likert-type format: (1) “<6 hours,” (2) “6–8 hours,” (3) “8–10 hours,” and (4) “>10 hours.”

No. 47 (three months prior to the pandemic) and No. 71 (past two weeks of the survey):

**“Did your child have difficulties falling asleep (e.g., within 20 minutes) after going to bed?”**

No. 48 (three months prior to the pandemic) and No. 72 (past two weeks of the survey):

**“Did your child wake up and remain awake during the night after falling asleep?”**

The answers for these questions were formulated in a Likert-type format: (1) “not at all,” (2) “rarely (less than once a week),” (3) “occasionally (once or twice a week),” (4) “often (three or more times a week but not daily),” and (5) “regularly (daily).

No. 49 (three months prior to the pandemic) and No. 73 (past two weeks of the survey):

**“How many days per week did your child exercise (e.g., increased heart rate and increased rate of breathing) for at least 30 minutes?”**

No. 50 (three months prior to the pandemic) and No. 74 (past two weeks of the survey):

**“How many days per week did your child spend time outdoors?”**

The answers for these questions were formulated in a Likert-type format: (1) “none,” (2) “1–2 days,” (3) “3–4 days,” (4) “5–6 days,” and (5) “daily.”

**Mass media and SNS usage**

No. 58 (three months prior to the pandemic) and No. 82 (past two weeks of the survey):

**“How much time per day did your child spend watching TV or digital media (e.g., Netflix, YouTube, and web surfing)?”**

No. 59 (three months prior to the pandemic) and No. 83 (past two weeks of the survey):

**“How much time per day did your child spend using social media (e.g., Facetime, Facebook, Instagram, Snapchat, Twitter, and TikTok)?”**

No. 60 (three months prior to the pandemic) and No. 84 (past two weeks of the survey):

**“How much time per day did your child spend playing video games?”**

The answers for these questions were formulated in a Likert-type format: (1) “no TV or digital media (social media or video games),” (2) “under 1 hour,” (3) “1–3 hours,” (4) “4–6 hours,” and (5) “more than 6 hours.”

**RRB symptoms**

No. 51 (three months prior to the pandemic) and No. 75 (past two weeks of the survey):

**“How frequently did your child engage in repetitive motor mannerisms/movements (e.g., repetitive movements of the whole body, or just with their hands and fingers)”**

No. 52 (three months prior to the pandemic) and No. 76 (past two weeks of the survey):

**“How frequently did your child engage in sensory-seeking behaviors (e.g., visually inspecting things, touching or feeling things for a long time)?”**

No. 53 (three months prior to the pandemic) and No. 77 (past two weeks of the survey):

**“How frequently did your child engage in other rituals or routines”**

No. 54 (three months prior to the pandemic) and No. 78 (past two weeks of the survey):

**“Did your child adjust easily to changes in daily routines (e.g., changes in time, location, order, or occurrence of regularly scheduled or typical daily activities such as appointments, mealtimes, or the addition of unexpected events/activities)?”**

No. 55 (three months prior to the pandemic) and No. 79 (past two weeks of the survey):

**“Did your child require family members and others he/she interacts with to maintain specific routines, rituals, habits, including doing things consistently, and requiring warning or change in family behavior (e.g., takes longer to complete tasks, changes schedule to accommodate child)?”**

No. 56 (three months prior to the pandemic) and No. 80 (past two weeks of the survey):

**“Did your child engage in an activity related to a highly restricted, strong interest (e.g., play with the toy/topic, talk about the toy/topic, watch content related to that toy/topic)?”**

The answers for these questions were formulated in a Likert-type format: (1) “not at all,” (2) “rarely,” (3) “occasionally,” (4) “often,” and (5) “regularly.”
